# Supplementary material for: Mortality due to low-quality health systems in the universal health coverage era: a systematic analysis of amenable deaths in 137 countries
Source: PubMed Central journal article supplement (PMC6238021; doi:10.1016/s0140-6736(18)31668-4), 2018-11-17
Supplement: mmc1.pdf [file mmc1.pdf]

# THE LANCET

## Supplementary appendix

This appendix formed part of the original submission and has been peer reviewed.  
We post it as supplied by the authors.

Supplement to: Kruk ME, Gage AD, Joseph NT, Danaei G, García-Saisó S, Salomon JA.  
Mortality due to low-quality health systems in the universal health coverage era:  
a systematic analysis of amenable deaths in 137 countries. *Lancet* 2018; published  
online Sept 5. [http://dx.doi.org/10.1016/http://dx.doi.org/10.1016/S0140-6736\(18\)31668-4](http://dx.doi.org/10.1016/http://dx.doi.org/10.1016/S0140-6736(18)31668-4).

## **Mortality due to low quality health systems—implications for universal health coverage**

Web extra material

Table of Contents

|                                                                                                              |           |
|--------------------------------------------------------------------------------------------------------------|-----------|
| <b>Table S1. Sensitivity results (all updated with new data)</b> .....                                       | <b>3</b>  |
| <b>Table S2. Condition table</b> .....                                                                       | <b>5</b>  |
| <b>Table S3. Definitions and data sources for health utilization measures (updated data)</b> .....           | <b>6</b>  |
| <b>S4 Methods. Imputation for missing utilization data</b> .....                                             | <b>8</b>  |
| <b>Table S5. Country results table (updated data)</b> .....                                                  | <b>9</b>  |
| <b>Table S6. Condition results</b> .....                                                                     | <b>14</b> |
| <b>Figure S7. Deaths due to poor quality and non-utilization by GBD region (updated data)</b>                | <b>16</b> |
| <b>Table S8. Guidelines for Accurate and Transparent Health Estimates Reporting (GATHER) Checklist</b> ..... | <b>17</b> |
| <b>References</b> .....                                                                                      | <b>19</b> |

**Table S1. Sensitivity results**

## Main results

|                 | <b>Estimate</b> | <b>Lower</b> | <b>Upper</b> |
|-----------------|-----------------|--------------|--------------|
| Amenable        | 8,647,323       | 8,505,807    | 8,788,839    |
| Poor quality    | 5,047,330       | 4,929,687    | 5,164,973    |
| Non-utilization | 3,599,993       | 3,495,958    | 3,704,029    |
| Preventable     | 7,001,198       | 6,794,128    | 7,208,268    |
| Avertable       | 15,648,521      | 15,363,438   | 15,933,604   |

## Sensitivity 1: Alternate reference group (4 best performing LMICs)

|                 | <b>Estimate</b> | <b>Lower</b> | <b>Upper</b> |
|-----------------|-----------------|--------------|--------------|
| Amenable        | 5,602,834       | 5,468,191    | 5,737,478    |
| Poor quality    | 3,159,260       | 3,045,519    | 3,273,001    |
| Non-utilization | 2,443,575       | 2,362,485    | 2,524,665    |
| Preventable     | 9,770,952       | 9,519,784    | 10,022,119   |
| Avertable       | 12,604,032      | 12,330,408   | 12,877,656   |

Notes: The reference group is the four LMIC best performing countries as identified by the Commission on Investing in Health: China, Cuba, Costa Rica and Chile.(1)

## Sensitivity 2: Limited UHC package

|                 | <b>Estimate</b> | <b>Lower</b> | <b>Upper</b> |
|-----------------|-----------------|--------------|--------------|
| Amenable        | 7,552,747       | 7,416,785    | 7,688,710    |
| Poor quality    | 4,740,948       | 4,628,071    | 4,853,825    |
| Non-utilization | 2,811,799       | 2,717,477    | 2,906,122    |
| Preventable     | 6,845,469       | 6,638,591    | 7,052,348    |
| Avertable       | 14,398,216      | 14,116,391   | 14,680,042   |

Notes: Excludes conditions which may be outside the scope of low-income UHC packages for low and low-middle income countries. 18 conditions are removed from the package: Cancers except for cervical cancer, congenital heart anomalies, poisonings, road injuries, mental and neurological disorders and chronic kidney disease. The condition list is unchanged in upper-middle income countries.

## Sensitivity 3: Alternate prevention approach using JPAF

|                 | <b>Estimate</b> | <b>Lower</b> | <b>Upper</b> |
|-----------------|-----------------|--------------|--------------|
| Amenable        | 6,974,740       | 6,796,681    | 7,152,799    |
| Poor quality    | 4,387,670       | 4,230,239    | 4,545,102    |
| Non-utilization | 2,587,069       | 2,474,311    | 2,699,828    |
| Preventable     | 4,989,560       | 4,894,500    | 5,084,620    |
| Avertable       | 11,964,299      | 11,738,810   | 12,189,789   |

Notes: Rather than using the rate ratios, this uses the populations attributable fractions to account for preventable conditions. Population attributable fractions for environmental/occupational and behavioral risks from the Global Burden of Disease were downloaded for all conditions(2). Metabolic risks were not considered because primary health care can play a large role in these risks.(3) A joint population attributable fraction was calculated:  $1 - (1 - PAF_{env/occ}) * (1 - PAF_{behavioral})$ . Mediation between environmental and behavioral risk factors was not included.

## Sensitivity 4: Adjusted utilization rates

|                 | <b>Estimate</b> | <b>Lower</b> | <b>Upper</b> |
|-----------------|-----------------|--------------|--------------|
| Amenable        | 8,647,323       | 8,505,807    | 8,788,839    |
| Poor quality    | 5,308,915       | 5,202,306    | 5,415,525    |
| Non-utilization | 3,338,408       | 3,243,328    | 3,433,488    |
| Preventable     | 7,001,198       | 6,794,128    | 7,208,268    |
| Avertable       | 15,648,521      | 15,363,438   | 15,933,604   |

Notes: Utilization rates derived from WHS – adult acute illness visit rate, visit to health facility in the past and cancer screening rate—are adjusted to account for potential increase since 2002/2003. Rates are set to the average rate of the next income group unless the utilization rate already exceeded this value. Low income countries were given the average utilization rate of low-middle income countries; low-middle income countries were given the average utilization rate of upper-middle income countries; upper-middle income countries were given the average utilization rate of high income countries.

Sensitivity 5: Assume utilizers face country's prevailing CFR

|                 | <b>Estimate</b> | <b>Lower</b> | <b>Upper</b> |
|-----------------|-----------------|--------------|--------------|
| Amenable        | 8,647,323       | 8,505,807    | 8,788,839    |
| Poor quality    | 5,701,497       | 5,612,948    | 5,790,047    |
| Non-utilization | 2,945,826       | 2,879,534    | 3,012,118    |
| Preventable     | 7,001,198       | 6,794,128    | 7,208,268    |
| Avertable       | 15,648,521      | 15,363,438   | 15,933,604   |

Sensitivity 6: Current health system burden

|                 | <b>Estimate</b> | <b>Lower</b> | <b>Upper</b> |
|-----------------|-----------------|--------------|--------------|
| Amenable        | 13,327,479      | 13,067,636   | 13,587,322   |
| Poor quality    | 7,610,659       | 7,409,225    | 7,812,094    |
| Non-utilization | 5,716,819       | 5,529,170    | 5,904,469    |

Notes: Does not adjust for preventable deaths

**Table S2. Condition table**

| <b>Conditions</b>                                                                                                                                                                                                    | <b>Age Range</b> | <b>Utilization measure</b>                                |
|----------------------------------------------------------------------------------------------------------------------------------------------------------------------------------------------------------------------|------------------|-----------------------------------------------------------|
| Conditions for which health system prevents incident cases<br><i>CFR = deaths/population of interest</i>                                                                                                             |                  |                                                           |
| HIV/AIDS                                                                                                                                                                                                             | 0-14             | Skilled birth attendance                                  |
| Vaccine preventable diseases (incl. Hepatitis B, Otitis Media, Varicella and herpes zoster, and Tetanus)                                                                                                             | 0-74             | Receipt of at least one vaccine                           |
| Vaccine preventable diseases (incl. Diphtheria, Measles, Meningococcal meningitis and Meningitis)                                                                                                                    | 0-74             | Receipt of at least one vaccine                           |
| Whooping cough                                                                                                                                                                                                       | 0-4              | Receipt of at least one vaccine                           |
| Cervical cancer                                                                                                                                                                                                      | 15-44            | Cancer screening rate                                     |
| Tuberculosis                                                                                                                                                                                                         | 0-74             | Case detection rate                                       |
| Acute conditions that are treated or cured with episodic care<br><i>CFR= deaths/incidence</i>                                                                                                                        |                  |                                                           |
| Neglected tropical diseases (incl. Cystic echinococcosis, cysticercosis, shistosomiasis, yellow fever, African trypanosomiasis, intestinal nematode infections, Chagas disease, leishmaniasis, dengue, encephalitis) | 0-74             | Infectious illness and child acute illness utilization    |
| Other infectious diseases (incl. malaria, intestinal infectious diseases, upper and lower respiratory infections)                                                                                                    | 0-74             | Infectious illness and child acute illness utilization    |
| Diarrheal disease                                                                                                                                                                                                    | 0-49             | Infectious illness and child acute illness utilization    |
| Tetanus                                                                                                                                                                                                              | 5-74             | Infectious illness and child acute illness utilization    |
| Maternal disorders                                                                                                                                                                                                   | 15-44            | Skilled birth attendance                                  |
| Neonatal disorders                                                                                                                                                                                                   | 0-4              | Skilled birth attendance                                  |
| Rheumatic heart disease                                                                                                                                                                                              | 0-44             | Other acute and child acute illness utilization           |
| Ischemic heart disease                                                                                                                                                                                               | 0-74             | Other acute and child acute illness utilization           |
| Ischemic stroke                                                                                                                                                                                                      | 0-74             | Other acute and child acute illness utilization           |
| Intracerebral hemorrhage                                                                                                                                                                                             | 0-74             | Other acute and child acute illness utilization           |
| Peptic ulcer disease                                                                                                                                                                                                 | 0-74             | Other acute and child acute illness utilization           |
| Paralytic ileus and intestinal obstruction                                                                                                                                                                           | 0-74             | Other acute and child acute illness utilization           |
| Appendicitis                                                                                                                                                                                                         | 0-74             | Other acute and child acute illness utilization           |
| Inguinal and femoral hernia                                                                                                                                                                                          | 0-74             | Other acute and child acute illness utilization           |
| Gallbladder and biliary diseases                                                                                                                                                                                     | 0-74             | Other acute and child acute illness utilization           |
| Asthma                                                                                                                                                                                                               | 0-14             | Other acute and child acute illness utilization           |
| Self-harm                                                                                                                                                                                                            | 10-74            | Depressed patients who have sought treatment in past year |
| Road injuries                                                                                                                                                                                                        | 0-74             | Road accident or injury utilization                       |
| Poisonings                                                                                                                                                                                                           | 0-74             | Utilization for acute illnesses                           |
| Adverse effects of medical treatment                                                                                                                                                                                 | 0-74             | N/A                                                       |
| Chronic conditions requiring sustained care to either cure or prevent sequelae<br><i>CFR= deaths/prevalence</i>                                                                                                      |                  |                                                           |
| HIV/AIDS                                                                                                                                                                                                             | 15-74            | People living with HIV who know their status              |
| Hypertensive heart disease                                                                                                                                                                                           | 0-74             | Other acute and child acute illness utilization           |
| Congenital heart anomalies                                                                                                                                                                                           | 0-14             | Other acute and child acute illness utilization           |
| Diabetes mellitus                                                                                                                                                                                                    | 0-49             | Health facility visit in past 1 year                      |
| Breast cancer                                                                                                                                                                                                        | 0-74             | Cancer screening rate                                     |
| Thyroid cancer                                                                                                                                                                                                       | 0-74             | Cancer screening rate                                     |
| Colon and rectum cancer                                                                                                                                                                                              | 0-74             | Cancer screening rate                                     |
| Uterine cancer                                                                                                                                                                                                       | 0-74             | Cancer screening rate                                     |
| Malignant skin melanoma                                                                                                                                                                                              | 0-74             | Cancer screening rate                                     |
| Non-melanoma skin cancer                                                                                                                                                                                             | 0-74             | Cancer screening rate                                     |
| Testicular cancer                                                                                                                                                                                                    | 0-74             | Cancer screening rate                                     |
| Hodgkin's lymphoma                                                                                                                                                                                                   | 0-74             | Cancer screening rate                                     |
| Leukemia                                                                                                                                                                                                             | 0-74             | Cancer screening rate                                     |
| COPD                                                                                                                                                                                                                 | 0-74             | Health facility visit in past 1 year                      |
| Chronic kidney disease (due to hypertension and due to diabetes)                                                                                                                                                     | 0-49             | Health facility visit in past 1 year                      |
| Epilepsy                                                                                                                                                                                                             | 0-74             | Depressed patients who have sought treatment in past year |
| Alcohol use disorders                                                                                                                                                                                                | 15-74            | Depressed patients who have sought treatment in past year |
| Drug use disorders                                                                                                                                                                                                   | 15-74            | Depressed patients who have sought treatment in past year |

**Table S3.** Definitions and data sources for health utilization measures

| <b>Utilization metric</b>                    | <b>Numerator</b>                                                       | <b>Denominator</b>                                                                                                                                                                                                                               | <b>Data sources</b>                                                                                       | <b>Conditions applied</b>                                                                                                                                                 | <b>N LMIC countries with data</b> | <b>Low income average<sup>a</sup></b> | <b>Low-middle income average<sup>a</sup></b> | <b>Upper-middle income average<sup>a</sup></b> |
|----------------------------------------------|------------------------------------------------------------------------|--------------------------------------------------------------------------------------------------------------------------------------------------------------------------------------------------------------------------------------------------|-----------------------------------------------------------------------------------------------------------|---------------------------------------------------------------------------------------------------------------------------------------------------------------------------|-----------------------------------|---------------------------------------|----------------------------------------------|------------------------------------------------|
| Infectious illness visit rate                | Sought care at in- or outpatient facility                              | Needed health care for self in the past year for high fever, severe diarrhea or cough                                                                                                                                                            | World Health Survey (WHS)(4)                                                                              | Malaria, intestinal infectious diseases, upper/lower respiratory infections, neglected tropical diseases                                                                  | 40                                | 75%                                   | 78%                                          | 88%                                            |
| Other acute illness visit rate               | Sought care at in- or outpatient facility                              | Needed health care for self in the past year for asthma, heart disease or minor surgery                                                                                                                                                          | WHS                                                                                                       | Cardiovascular disorders, digestive disorders, asthma                                                                                                                     | 40                                | 88%                                   | 88%                                          | 92%                                            |
| Child acute illness visit rate               | Sought care for fever, diarrhea, or cough at a health facility         | Children under 5 years with fever, diarrhea or cough in the past 2 weeks                                                                                                                                                                         | Most recent available Demographic and Health Survey (DHS)(5), Multiple Indicator Cluster Survey (MICS)(6) | Malaria, intestinal infectious diseases, upper and lower respiratory infections, neglected tropical diseases, digestive disorders, asthma, poisonings, childhood leukemia | 85                                | 46%                                   | 55%                                          | 60%                                            |
| Visit to health facility in the past year    | Visit with doctor, nurse or midwife in the past 12 months (outpatient) | All respondents                                                                                                                                                                                                                                  | WHS                                                                                                       | Diabetes mellitus, chronic obstructive pulmonary disease, chronic kidney disease                                                                                          | 40                                | 28%                                   | 34%                                          | 40%                                            |
| Ever vaccinated                              | Receipt of any one dose vaccine                                        | Children under 5 years                                                                                                                                                                                                                           | DHS or MICS                                                                                               | Hepatitis B, vaccine preventable diseases                                                                                                                                 | 83                                | 90%                                   | 94%                                          | 94%                                            |
| Cancer screening rate                        | Ever received pap smear                                                | Women age 18-70 years                                                                                                                                                                                                                            | WHS                                                                                                       | All neoplasms except childhood leukemia                                                                                                                                   | 40                                | 6%                                    | 17%                                          | 38%                                            |
| Road accident or injury utilization          | Received medical care or treatment for injuries                        | In the past 12 months, involved in a road traffic accident where suffered from bodily injury or other injury that limited everyday activities due to fall, burn, poisoning, submersion in water or by a firearm, sharp weapon or act of violence | WHS                                                                                                       | Road injury and poisonings                                                                                                                                                | 40                                | 53%                                   | 58%                                          | 64%                                            |
| Sought care for mental health disorder       | Sought treatment in past year for depression symptoms                  | Depression Symptoms                                                                                                                                                                                                                              | World Mental Health Survey from Thornicroft et al(7)                                                      | Neurologic and mental health disorders                                                                                                                                    | 11                                | 16%                                   | 22%                                          | 28%                                            |
| People living with HIV who know their status | People living with HIV who know their status                           | HIV positive people                                                                                                                                                                                                                              | UNAIDS(8)                                                                                                 | HIV over age 15                                                                                                                                                           | 80                                | 50%                                   | 59%                                          | 73%                                            |
| TB case detection rate                       | Number of new and relapse TB cases                                     | Estimate of the number of incident TB cases for                                                                                                                                                                                                  | World Development Indicators (WDI) (9)                                                                    | TB                                                                                                                                                                        | 137                               | 58%                                   | 67%                                          | 79%                                            |

|                          |                                                       |                             |        |                                                          |     |     |     |     |
|--------------------------|-------------------------------------------------------|-----------------------------|--------|----------------------------------------------------------|-----|-----|-----|-----|
|                          | diagnosed and treated in national TB control programs | the same year               |        |                                                          |     |     |     |     |
| Skilled birth attendance | Births attended by skilled health staff               | Total number of live births | WDI(9) | Maternal disorders, neonatal disorders, HIV under age 15 | 138 | 55% | 79% | 96% |

<sup>a</sup>Includes predicted values as described in S4 Methods



#### **S4 Methods.** Imputation for missing utilization data

We imputed utilization for countries with missing data (Table S3) based on known predictors of utilization. We regressed utilization for each condition on GDP per capita, percent rural, female literacy rate, land area, doctors and nurses/midwives per capita and the GBD region. These variables explained 59% of the variation in utilization on average across conditions. We used the most recent data on the predictors available from the past fifteen years from the World Development Indicators database.<sup>(9)</sup> We excluded GBD regions from the mental health utilization prediction model due to few degrees of freedom.

We then predicted missing utilization values using a generalized linear model with a binomial link to constrain the values to between 0 and 100%. Female literacy rates were unavailable from WDI for 59 countries. Of these, 38 countries were high income and assumed to have 100% female literacy. We filled in female literacy rates for nine additional missing countries with data from the CIA World Factbook. In the remaining countries without full data for the predictors (mostly small island states), we set utilization to the GBD region mean after predicting utilization for other countries.

**Table S5.** Country results table

| Country                  | Avertable deaths                                     |                                | Amenable deaths            |                               | Percent of amenable deaths due to poor quality | Years of life lost to poor quality (1000s) | Poor quality deaths per 100,000 people |
|--------------------------|------------------------------------------------------|--------------------------------|----------------------------|-------------------------------|------------------------------------------------|--------------------------------------------|----------------------------------------|
|                          | Deaths preventable by population level interventions | Deaths amenable to health care | Deaths due to poor quality | Deaths due to non-utilization |                                                |                                            |                                        |
| Afghanistan              | 83,540                                               | 80,556                         | 46,153                     | 34,403                        | 57%                                            | 2,609                                      | 142                                    |
| Albania                  | 1,222                                                | 2,407                          | 2,081                      | 326                           | 86%                                            | 64                                         | 72                                     |
| Algeria                  | 17,122                                               | 28,554                         | 17,966                     | 10,588                        | 63%                                            | 1,047                                      | 45                                     |
| American Samoa           | 12                                                   | 30                             | 23                         | 6                             | 79%                                            | 1                                          | 23                                     |
| Angola                   | 45,581                                               | 48,092                         | 17,075                     | 31,017                        | 36%                                            | 993                                        | 68                                     |
| Argentina                | 10,010                                               | 39,488                         | 29,229                     | 10,258                        | 74%                                            | 1,118                                      | 67                                     |
| Armenia                  | 1,010                                                | 2,995                          | 1,600                      | 1,396                         | 53%                                            | 53                                         | 53                                     |
| Azerbaijan               | 7,132                                                | 12,394                         | 8,000                      | 4,394                         | 65%                                            | 400                                        | 82                                     |
| Bangladesh               | 117,549                                              | 182,905                        | 91,631                     | 91,275                        | 50%                                            | 3,801                                      | 57                                     |
| Belarus                  | 17,424                                               | 12,382                         | 7,906                      | 4,477                         | 64%                                            | 231                                        | 83                                     |
| Belize                   | 190                                                  | 281                            | 208                        | 73                            | 74%                                            | 9                                          | 52                                     |
| Benin                    | 24,833                                               | 22,456                         | 12,777                     | 9,679                         | 57%                                            | 786                                        | 117                                    |
| Bhutan                   | 369                                                  | 864                            | 599                        | 265                           | 69%                                            | 29                                         | 75                                     |
| Bolivia                  | 6,207                                                | 11,846                         | 8,343                      | 3,503                         | 70%                                            | 412                                        | 78                                     |
| Bosnia and Herzegovina   | 2,436                                                | 3,447                          | 2,504                      | 943                           | 73%                                            | 64                                         | 66                                     |
| Botswana                 | 6,158                                                | 3,118                          | 1,408                      | 1,710                         | 45%                                            | 62                                         | 61                                     |
| Brazil                   | 76,295                                               | 204,036                        | 153,327                    | 50,708                        | 75%                                            | 5,966                                      | 74                                     |
| Bulgaria                 | 9,107                                                | 10,544                         | 9,064                      | 1,480                         | 86%                                            | 240                                        | 126                                    |
| Burkina Faso             | 62,017                                               | 38,196                         | 21,914                     | 16,282                        | 57%                                            | 1,364                                      | 121                                    |
| Burundi                  | 31,054                                               | 31,476                         | 18,355                     | 13,120                        | 58%                                            | 1,081                                      | 164                                    |
| Cambodia                 | 18,402                                               | 22,313                         | 14,544                     | 7,770                         | 65%                                            | 651                                        | 93                                     |
| Cameroon                 | 80,697                                               | 49,751                         | 27,895                     | 21,855                        | 56%                                            | 1,642                                      | 120                                    |
| Cape Verde               | 255                                                  | 384                            | 184                        | 200                           | 48%                                            | 9                                          | 37                                     |
| Central African Republic | 22,994                                               | 19,778                         | 10,110                     | 9,668                         | 51%                                            | 543                                        | 206                                    |
| Chad                     | 49,727                                               | 37,466                         | 15,360                     | 22,106                        | 41%                                            | 980                                        | 110                                    |

|                                  |           |           |           |         |     |        |     |
|----------------------------------|-----------|-----------|-----------|---------|-----|--------|-----|
| China                            | 847,843   | 1,283,099 | 629,765   | 653,334 | 49% | 21,628 | 46  |
| Colombia                         | 4,625     | 33,917    | 22,080    | 11,836  | 65% | 918    | 46  |
| Comoros                          | 700       | 1,111     | 604       | 507     | 54% | 37     | 76  |
| Congo                            | 11,048    | 9,330     | 4,950     | 4,380   | 53% | 299    | 108 |
| Costa Rica                       | 367       | 2,303     | 1,240     | 1,063   | 54% | 51     | 26  |
| Cote d'Ivoire                    | 73,042    | 55,959    | 31,929    | 24,030  | 57% | 1,733  | 141 |
| Croatia                          | 2,317     | 3,434     | 2,498     | 936     | 73% | 62     | 59  |
| Cuba                             | 3,504     | 8,735     | 5,209     | 3,526   | 60% | 139    | 46  |
| Democratic Republic of the Congo | 206,998   | 192,864   | 108,098   | 84,766  | 56% | 6,484  | 140 |
| Djibouti                         | 1,500     | 1,718     | 1,134     | 583     | 66% | 67     | 126 |
| Dominica                         | 28        | 35        | 30        | 5       | 85% | 1      | 30  |
| Dominican Republic               | 7,657     | 8,762     | 6,594     | 2,168   | 75% | 291    | 63  |
| Ecuador                          | 3,817     | 11,351    | 6,447     | 4,905   | 57% | 344    | 40  |
| Egypt                            | 104,457   | 93,828    | 63,063    | 30,765  | 67% | 2,770  | 69  |
| El Salvador                      | 1,619     | 5,247     | 3,666     | 1,581   | 70% | 155    | 60  |
| Equatorial Guinea                | 2,352     | 1,048     | 482       | 566     | 46% | 33     | 60  |
| Eritrea                          | 7,916     | 9,973     | 5,117     | 4,856   | 51% | 232    | 114 |
| Ethiopia                         | 131,571   | 176,840   | 79,923    | 96,917  | 45% | 3,601  | 80  |
| Federated States of Micronesia   | 92        | 137       | 95        | 41      | 70% | 3      | 95  |
| Fiji                             | 875       | 1,253     | 771       | 482     | 62% | 30     | 86  |
| Gabon                            | 3,026     | 2,605     | 1,328     | 1,277   | 51% | 77     | 78  |
| Georgia                          | 3,207     | 5,601     | 2,993     | 2,608   | 53% | 114    | 81  |
| Ghana                            | 55,901    | 43,048    | 23,615    | 19,433  | 55% | 1,290  | 86  |
| Grenada                          | 50        | 67        | 57        | 11      | 84% | 2      | 57  |
| Guatemala                        | 7,358     | 16,411    | 10,488    | 5,923   | 64% | 542    | 64  |
| Guinea                           | 39,526    | 30,855    | 16,892    | 13,963  | 55% | 947    | 134 |
| Guinea-Bissau                    | 5,153     | 5,480     | 2,852     | 2,628   | 52% | 147    | 158 |
| Guyana                           | 967       | 1,299     | 938       | 361     | 72% | 34     | 117 |
| Haiti                            | 22,897    | 21,858    | 14,978    | 6,879   | 69% | 665    | 140 |
| Honduras                         | 2,366     | 8,468     | 6,109     | 2,359   | 72% | 291    | 75  |
| India                            | 1,498,027 | 2,438,342 | 1,599,870 | 838,473 | 66% | 64,664 | 122 |
| Indonesia                        | 235,662   | 351,190   | 225,641   | 125,549 | 64% | 9,461  | 88  |

|                  |        |         |        |        |     |       |     |
|------------------|--------|---------|--------|--------|-----|-------|-----|
| Iran             | 41,077 | 63,044  | 42,546 | 20,499 | 67% | 2,205 | 54  |
| Iraq             | 43,040 | 49,696  | 36,041 | 13,655 | 73% | 2,266 | 99  |
| Jamaica          | 1,324  | 1,861   | 1,242  | 619    | 67% | 54    | 46  |
| Jordan           | 3,013  | 4,245   | 2,670  | 1,575  | 63% | 179   | 35  |
| Kazakhstan       | 16,190 | 27,344  | 20,019 | 7,325  | 73% | 719   | 114 |
| Kenya            | 87,089 | 52,267  | 19,940 | 32,328 | 38% | 1,250 | 43  |
| Kiribati         | 154    | 193     | 138    | 55     | 72% | 6     | 138 |
| Kyrgyzstan       | 4,856  | 7,172   | 4,518  | 2,654  | 63% | 229   | 75  |
| Laos             | 10,204 | 15,239  | 9,115  | 6,124  | 60% | 475   | 134 |
| Lebanon          | 1,830  | 1,101   | 399    | 702    | 36% | 27    | 7   |
| Lesotho          | 12,584 | 7,252   | 4,377  | 2,875  | 60% | 235   | 208 |
| Liberia          | 10,138 | 8,251   | 4,298  | 3,954  | 52% | 246   | 96  |
| Libya            | 3,081  | 3,649   | 2,143  | 1,506  | 59% | 99    | 34  |
| Macedonia        | 1,616  | 2,105   | 1,753  | 352    | 83% | 51    | 83  |
| Madagascar       | 50,525 | 50,015  | 25,731 | 24,284 | 51% | 1,399 | 106 |
| Malawi           | 59,542 | 35,363  | 20,234 | 15,128 | 57% | 1,463 | 118 |
| Malaysia         | 19,805 | 24,653  | 17,017 | 7,636  | 69% | 543   | 56  |
| Maldives         | 25     | 138     | 103    | 35     | 75% | 3     | 26  |
| Mali             | 58,491 | 37,602  | 18,680 | 18,922 | 50% | 1,250 | 106 |
| Marshall Islands | 73     | 73      | 49     | 24     | 67% | 2     | 49  |
| Mauritania       | 3,916  | 4,879   | 2,108  | 2,771  | 43% | 125   | 51  |
| Mauritius        | 595    | 1,287   | 980    | 307    | 76% | 33    | 75  |
| Mexico           | 15,564 | 101,675 | 71,432 | 30,243 | 70% | 3,208 | 56  |
| Moldova          | 6,389  | 6,265   | 3,938  | 2,327  | 63% | 115   | 109 |
| Mongolia         | 3,556  | 3,955   | 2,614  | 1,340  | 66% | 124   | 87  |
| Montenegro       | 496    | 426     | 344    | 81     | 81% | 9     | 57  |
| Morocco          | 22,005 | 34,996  | 19,241 | 15,755 | 55% | 866   | 56  |
| Mozambique       | 96,122 | 66,515  | 27,315 | 39,200 | 41% | 1,685 | 98  |
| Myanmar          | 46,618 | 74,692  | 35,679 | 39,014 | 48% | 1,530 | 66  |
| Namibia          | 6,357  | 4,171   | 2,554  | 1,617  | 61% | 140   | 102 |
| Nepal            | 27,541 | 46,400  | 26,556 | 19,845 | 57% | 1,114 | 93  |
| Nicaragua        | 882    | 3,999   | 2,463  | 1,537  | 62% | 114   | 40  |
| Niger            | 74,881 | 44,245  | 22,611 | 21,634 | 51% | 1,359 | 114 |

|                                     |         |         |         |         |     |        |     |
|-------------------------------------|---------|---------|---------|---------|-----|--------|-----|
| Nigeria                             | 545,898 | 376,039 | 122,664 | 253,375 | 33% | 9,062  | 67  |
| North Korea                         | 27,993  | 51,931  | 35,128  | 16,803  | 68% | 1,395  | 139 |
| Pakistan                            | 256,683 | 348,174 | 225,389 | 122,785 | 65% | 11,932 | 119 |
| Palestine                           | 3,156   | 4,722   | 3,652   | 1,070   | 77% | 222    | 83  |
| Panama                              | 825     | 2,545   | 1,640   | 905     | 64% | 72     | 42  |
| Papua New Guinea                    | 17,141  | 17,188  | 10,439  | 6,749   | 61% | 468    | 137 |
| Paraguay                            | 2,530   | 6,050   | 4,245   | 1,805   | 70% | 189    | 64  |
| Peru                                | 8,131   | 13,611  | 6,618   | 6,993   | 49% | 373    | 21  |
| Philippines                         | 103,342 | 141,696 | 92,587  | 49,109  | 65% | 3,805  | 92  |
| Romania                             | 18,564  | 21,729  | 16,764  | 4,965   | 77% | 461    | 85  |
| Russia                              | 299,856 | 204,791 | 131,744 | 73,047  | 64% | 4,265  | 91  |
| Rwanda                              | 16,020  | 17,847  | 11,691  | 6,157   | 66% | 695    | 101 |
| Saint Lucia                         | 50      | 103     | 66      | 37      | 64% | 2      | 33  |
| Saint Vincent and the<br>Grenadines | 58      | 94      | 79      | 15      | 84% | 3      | 79  |
| Samoa                               | 87      | 188     | 112     | 76      | 60% | 3      | 56  |
| Sao Tome and Principe               | 111     | 138     | 87      | 51      | 63% | 5      | 43  |
| Senegal                             | 22,776  | 25,399  | 12,481  | 12,918  | 49% | 598    | 83  |
| Serbia                              | 5,930   | 8,922   | 6,770   | 2,152   | 76% | 186    | 95  |
| Sierra Leone                        | 24,094  | 16,601  | 10,549  | 6,052   | 64% | 658    | 162 |
| Solomon Islands                     | 833     | 1,064   | 710     | 355     | 67% | 28     | 118 |
| Somalia                             | 23,002  | 28,505  | 14,755  | 13,750  | 52% | 729    | 137 |
| South Africa                        | 180,104 | 96,969  | 51,422  | 45,547  | 53% | 2,864  | 93  |
| South Sudan                         | 40,536  | 37,470  | 15,562  | 21,908  | 42% | 935    | 127 |
| Sri Lanka                           | 7,252   | 18,121  | 10,721  | 7,401   | 59% | 319    | 51  |
| Sudan                               | 44,352  | 63,248  | 40,588  | 22,660  | 64% | 2,460  | 101 |
| Suriname                            | 442     | 648     | 462     | 186     | 71% | 19     | 92  |
| Swaziland                           | 5,458   | 3,155   | 1,977   | 1,177   | 63% | 116    | 152 |
| Syria                               | 10,910  | 9,833   | 6,828   | 3,004   | 69% | 287    | 37  |
| Tajikistan                          | 8,151   | 9,432   | 5,605   | 3,827   | 59% | 329    | 66  |
| Tanzania                            | 110,802 | 91,921  | 44,613  | 47,309  | 49% | 2,705  | 83  |
| Thailand                            | 31,464  | 49,872  | 21,758  | 28,114  | 44% | 773    | 32  |
| The Gambia                          | 3,278   | 2,786   | 1,223   | 1,562   | 44% | 64     | 61  |

|              |         |        |        |        |     |       |     |
|--------------|---------|--------|--------|--------|-----|-------|-----|
| Timor-Leste  | 869     | 1,481  | 859    | 622    | 58% | 38    | 72  |
| Togo         | 20,091  | 13,453 | 6,626  | 6,827  | 49% | 302   | 91  |
| Tonga        | 38      | 83     | 51     | 32     | 61% | 2     | 51  |
| Tunisia      | 5,300   | 7,266  | 4,052  | 3,213  | 56% | 167   | 37  |
| Turkey       | 24,030  | 33,489 | 16,526 | 16,962 | 49% | 1,064 | 21  |
| Turkmenistan | 4,891   | 6,851  | 4,810  | 2,041  | 70% | 259   | 89  |
| Uganda       | 99,096  | 80,562 | 42,225 | 38,337 | 52% | 2,553 | 108 |
| Ukraine      | 104,362 | 71,081 | 44,202 | 26,879 | 62% | 1,398 | 98  |
| Uzbekistan   | 36,658  | 42,851 | 24,721 | 18,130 | 58% | 1,095 | 79  |
| Vanuatu      | 401     | 511    | 353    | 158    | 69% | 14    | 118 |
| Venezuela    | 6,497   | 33,700 | 24,728 | 8,972  | 73% | 1,080 | 80  |
| Vietnam      | 41,222  | 87,651 | 52,256 | 35,395 | 60% | 2,025 | 57  |
| Yemen        | 33,407  | 43,588 | 23,874 | 19,714 | 55% | 1,321 | 89  |
| Zambia       | 48,888  | 39,812 | 22,586 | 17,226 | 57% | 1,237 | 139 |
| Zimbabwe     | 48,228  | 37,454 | 23,971 | 13,483 | 64% | 1,407 | 154 |

**Table S6.** Condition results

| Condition                   | Avertable deaths                                     |                                | Amenable deaths            |                               |
|-----------------------------|------------------------------------------------------|--------------------------------|----------------------------|-------------------------------|
|                             | Deaths preventable by population level interventions | Deaths amenable to health care | Deaths due to poor quality | Deaths due to non-utilization |
| Congenital                  | 18,289                                               | 129,452                        | 36,203                     | 93,248                        |
| Cardiovascular diseases     | 2,467,428                                            | 2,816,650                      | 2,357,525                  | 459,125                       |
| Other infectious            | 2,115,355                                            | 438,498                        | 210,401                    | 228,098                       |
| External                    | 982                                                  | 125,666                        | 103,865                    | 21,801                        |
| Neglected tropical diseases | 79,848                                               | 23,838                         | 15,697                     | 8,141                         |
| HIV/AIDS                    | 692,932                                              | 282,420                        | 147,000                    | 135,420                       |
| Cancer                      | 10,145                                               | 477,426                        | 52,598                     | 424,828                       |
| Mental health               | 84,229                                               | 454,723                        | 69,496                     | 385,227                       |
| Road injuries               | 188,861                                              | 693,798                        | 372,736                    | 321,062                       |
| Gastro-intestinal diseases  | 143,228                                              | 184,942                        | 153,571                    | 31,371                        |
| Vaccine preventable         | 241,342                                              | 231,291                        | 186,787                    | 44,504                        |
| Diabetes                    | 93,373                                               | 46,835                         | 10,779                     | 36,056                        |
| Neonatal                    | 456,339                                              | 1,080,817                      | 657,555                    | 423,262                       |
| Tuberculosis                | -                                                    | 946,003                        | 469,956                    | 476,047                       |
| Maternal                    | 102,984                                              | 103,908                        | 56,634                     | 47,274                        |
| Chronic respiratory         | 305,862                                              | 611,057                        | 146,527                    | 464,530                       |

**Table S7.** Reference group: countries with score over 90 on UHC index (10)

|           |             |
|-----------|-------------|
| Andorra   | Italy       |
| Australia | Japan       |
| Austria   | Luxembourg  |
| Belgium   | Netherlands |
| Canada    | Norway      |
| Denmark   | Singapore   |
| Finland   | Slovenia    |
| France    | South Korea |
| Germany   | Spain       |
| Greece    | Sweden      |
| Iceland   | Switzerland |
| Ireland   |             |



**Figure S8.** Deaths due to poor quality and non-utilization by GBD region

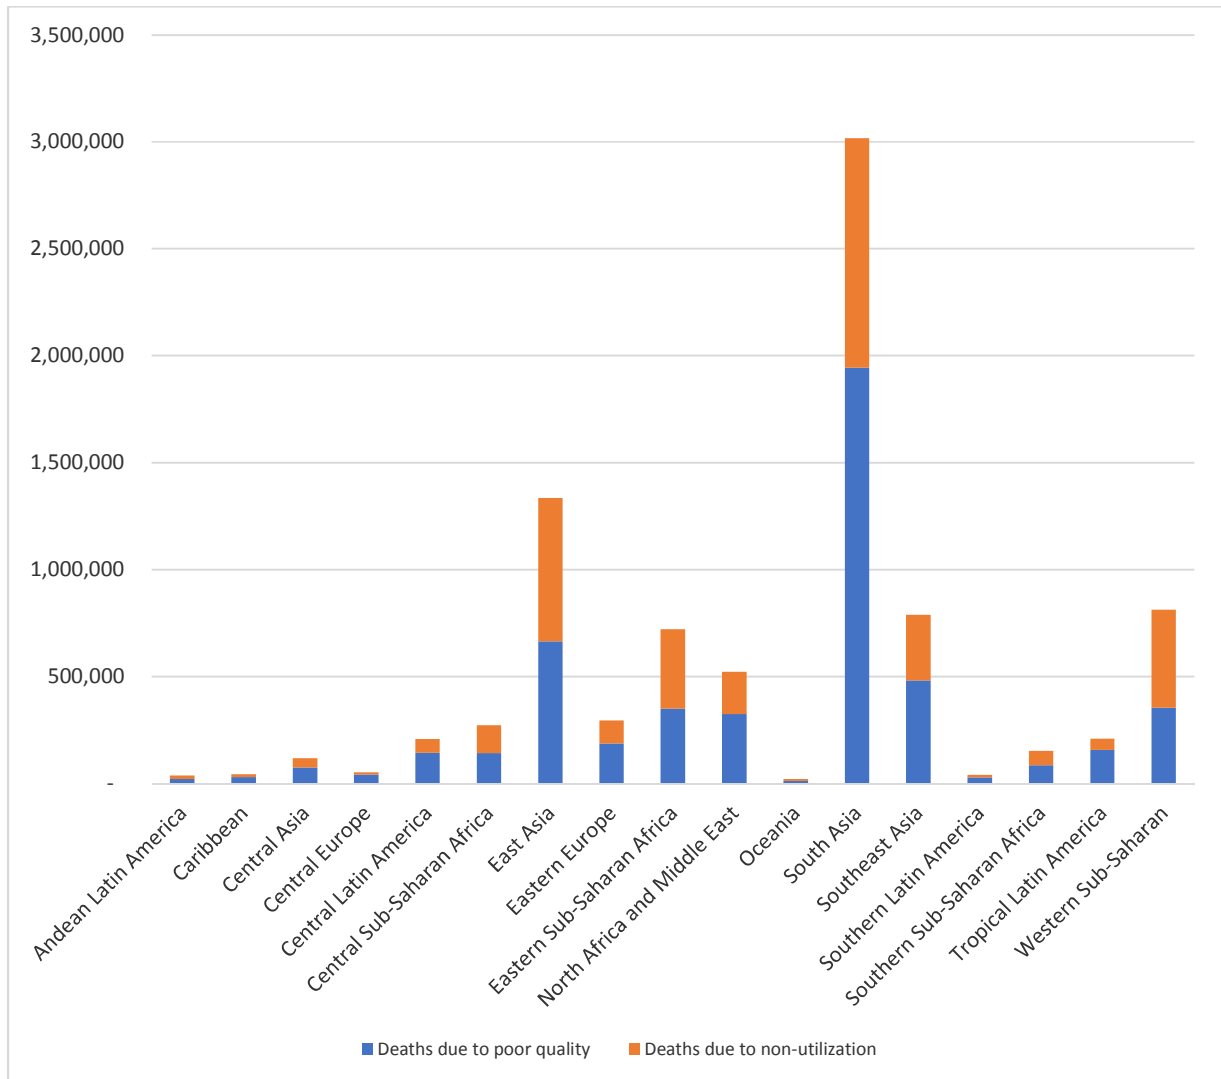

**Table S9. Guidelines for Accurate and Transparent Health Estimates Reporting (GATHER) Checklist**

| #                                                                                                     | GATHER checklist item                                                                                                                                                                                                                                                                                                                                                                  | Description of compliance                                                                                                                                         | Reference                                                                                                                                                                                                                                                                                                                                                                                                                                                                                                                                                                                                                                                                                               |
|-------------------------------------------------------------------------------------------------------|----------------------------------------------------------------------------------------------------------------------------------------------------------------------------------------------------------------------------------------------------------------------------------------------------------------------------------------------------------------------------------------|-------------------------------------------------------------------------------------------------------------------------------------------------------------------|---------------------------------------------------------------------------------------------------------------------------------------------------------------------------------------------------------------------------------------------------------------------------------------------------------------------------------------------------------------------------------------------------------------------------------------------------------------------------------------------------------------------------------------------------------------------------------------------------------------------------------------------------------------------------------------------------------|
| <b>Objectives and funding</b>                                                                         |                                                                                                                                                                                                                                                                                                                                                                                        |                                                                                                                                                                   |                                                                                                                                                                                                                                                                                                                                                                                                                                                                                                                                                                                                                                                                                                         |
| 1                                                                                                     | Define the indicators, populations, and time periods for which estimates were made.                                                                                                                                                                                                                                                                                                    | Provided in main text and appendix.                                                                                                                               | Methods, Table 1, Table S2                                                                                                                                                                                                                                                                                                                                                                                                                                                                                                                                                                                                                                                                              |
| 2                                                                                                     | List the funding sources for the work.                                                                                                                                                                                                                                                                                                                                                 | Funding sources listed.                                                                                                                                           | Funding                                                                                                                                                                                                                                                                                                                                                                                                                                                                                                                                                                                                                                                                                                 |
| <b>Data Inputs</b>                                                                                    |                                                                                                                                                                                                                                                                                                                                                                                        |                                                                                                                                                                   |                                                                                                                                                                                                                                                                                                                                                                                                                                                                                                                                                                                                                                                                                                         |
| <i>For all data inputs from multiple sources that are synthesized as part of the study:</i>           |                                                                                                                                                                                                                                                                                                                                                                                        |                                                                                                                                                                   |                                                                                                                                                                                                                                                                                                                                                                                                                                                                                                                                                                                                                                                                                                         |
| 3                                                                                                     | Describe how the data were identified and how the data were accessed.                                                                                                                                                                                                                                                                                                                  | Main text includes narrative description of data collection methodology.                                                                                          | Methods, Table S3                                                                                                                                                                                                                                                                                                                                                                                                                                                                                                                                                                                                                                                                                       |
| 4                                                                                                     | Specify the inclusion and exclusion criteria. Identify all ad-hoc exclusions.                                                                                                                                                                                                                                                                                                          | Main text includes narrative description of inclusion and exclusion criteria.                                                                                     | Methods, Table S3                                                                                                                                                                                                                                                                                                                                                                                                                                                                                                                                                                                                                                                                                       |
| 5                                                                                                     | Provide information on all included data sources and their main characteristics. For each data source used, report reference information or contact name/institution, population represented, data collection method, year(s) of data collection, sex and age range, diagnostic criteria or measurement method, and sample size, as relevant.                                          | Main text has narrative of data downloaded from GBD; GBD online data source tool that provides metadata for data sources by component, geography, cause, and risk | Methods, Table S2; Online data tools for GBD data: <a href="http://ghdx.healthdata.org/gbd-2013-data-citations">http://ghdx.healthdata.org/gbd-2013-data-citations</a>                                                                                                                                                                                                                                                                                                                                                                                                                                                                                                                                  |
| 6                                                                                                     | Identify and describe any categories of input data that have potentially important biases (e.g., based on characteristics listed in item 5).                                                                                                                                                                                                                                           | Description of known biases by data type included in SA.                                                                                                          | Methods, Discussion, Table S1                                                                                                                                                                                                                                                                                                                                                                                                                                                                                                                                                                                                                                                                           |
| <i>For data inputs that contribute to the analysis but were not synthesized as part of the study:</i> |                                                                                                                                                                                                                                                                                                                                                                                        |                                                                                                                                                                   |                                                                                                                                                                                                                                                                                                                                                                                                                                                                                                                                                                                                                                                                                                         |
| 7                                                                                                     | Describe and give sources for any other data inputs.                                                                                                                                                                                                                                                                                                                                   | Appendix Table S3 lists data sources used for all utilization rates. More information on this data is available from the references.                              | Table S3; Appendix references                                                                                                                                                                                                                                                                                                                                                                                                                                                                                                                                                                                                                                                                           |
| <i>For all data inputs:</i>                                                                           |                                                                                                                                                                                                                                                                                                                                                                                        |                                                                                                                                                                   |                                                                                                                                                                                                                                                                                                                                                                                                                                                                                                                                                                                                                                                                                                         |
| 8                                                                                                     | Provide all data inputs in a file format from which data can be efficiently extracted (e.g., a spreadsheet as opposed to a PDF), including all relevant meta-data listed in item 5. For any data inputs that cannot be shared due to ethical or legal reasons, such as third-party ownership, provide a contact name or the name of the institution that retains the right to the data | Data inputs were obtained from publicly available online tools or published manuscripts (Higashi et al and Thornicroft et al).                                    | Online data references:<br>GBD: <a href="http://ghdx.healthdata.org/gbd-data-tool">http://ghdx.healthdata.org/gbd-data-tool</a><br>WHS: <a href="http://apps.who.int/healthinfo/systems/surveydata/index.php/catalog/whs">http://apps.who.int/healthinfo/systems/surveydata/index.php/catalog/whs</a><br>DHS: <a href="https://dhsprogram.com/What-We-Do/Survey-Types/DHS.cfm">https://dhsprogram.com/What-We-Do/Survey-Types/DHS.cfm</a><br>MICs: <a href="http://mics.unicef.org/surveys">http://mics.unicef.org/surveys</a><br>AIDSinfo: <a href="http://aidsinfo.unaids.org/">http://aidsinfo.unaids.org/</a><br>WDI: <a href="http://wdi.worldbank.org/tables">http://wdi.worldbank.org/tables</a> |
| <b>Data Analysis</b>                                                                                  |                                                                                                                                                                                                                                                                                                                                                                                        |                                                                                                                                                                   |                                                                                                                                                                                                                                                                                                                                                                                                                                                                                                                                                                                                                                                                                                         |
| 9                                                                                                     | Provide a conceptual overview of the data analysis method. A diagram may be helpful.                                                                                                                                                                                                                                                                                                   | Main text includes description of data analysis                                                                                                                   | Methods                                                                                                                                                                                                                                                                                                                                                                                                                                                                                                                                                                                                                                                                                                 |
| 10                                                                                                    | Provide a detailed description of all steps of the analysis, including mathematical formulae. This description should cover, as relevant, data cleaning, data pre-processing, data adjustments and weighting of data sources, and mathematical or statistical model(s).                                                                                                                | Main text includes narrative description of methodology for case fatality, avertable death, quality avertable death and utilization avertable death calculations  | Methods, Table S1                                                                                                                                                                                                                                                                                                                                                                                                                                                                                                                                                                                                                                                                                       |
| 11                                                                                                    | Describe how candidate models were evaluated and how the final model(s) were selected.                                                                                                                                                                                                                                                                                                 | N/A                                                                                                                                                               | N/A                                                                                                                                                                                                                                                                                                                                                                                                                                                                                                                                                                                                                                                                                                     |
| 12                                                                                                    | Provide the results of an evaluation of model performance, if done, as well as the results of any relevant sensitivity analysis.                                                                                                                                                                                                                                                       | Table S1 describes in detail all of the sensitivity analyses completed and the results. These are all briefly mentioned in the main text.                         | Table S1                                                                                                                                                                                                                                                                                                                                                                                                                                                                                                                                                                                                                                                                                                |
| 13                                                                                                    | Describe methods for calculating uncertainty of the estimates. State which sources of uncertainty were, and were not, accounted for in the uncertainty analysis.                                                                                                                                                                                                                       | These are described in the methods: we used the upper and lower estimates of deaths from GBD. Intervals reported in text and table                                | Methods, Table S1                                                                                                                                                                                                                                                                                                                                                                                                                                                                                                                                                                                                                                                                                       |

|                               |                                                                                                                                                          |                                                                                                                           |                                                                                                                                                                                              |
|-------------------------------|----------------------------------------------------------------------------------------------------------------------------------------------------------|---------------------------------------------------------------------------------------------------------------------------|----------------------------------------------------------------------------------------------------------------------------------------------------------------------------------------------|
|                               |                                                                                                                                                          | S1.                                                                                                                       |                                                                                                                                                                                              |
| 14                            | State how analytic or statistical source code used to generate estimates can be accessed.                                                                | The main analytic do file is posted to the Harvard data repository website.                                               | Available from <a href="https://dataverse.harvard.edu/dataset.xhtml?persistentId=doi:10.7910/DVN/DUY0UI">https://dataverse.harvard.edu/dataset.xhtml?persistentId=doi:10.7910/DVN/DUY0UI</a> |
| <b>Results and Discussion</b> |                                                                                                                                                          |                                                                                                                           |                                                                                                                                                                                              |
| 15                            | Provide published estimates in a file format from which data can be efficiently extracted.                                                               | Provided in table format in main text, results section, as well as in the supplementary appendices.                       | Results; Supplementary files                                                                                                                                                                 |
| 16                            | Report a quantitative measure of the uncertainty of the estimates (e.g. uncertainty intervals).                                                          | Noted uncertainty estimates for main model in text of results, all other uncertainty intervals are presented in Table S1. | Results and Table S1                                                                                                                                                                         |
| 17                            | Interpret results in light of existing evidence. If updating a previous set of estimates, describe the reasons for changes in estimates.                 | Provided in narrative format; discussion section.                                                                         | Main text: discussion section                                                                                                                                                                |
| 18                            | Discuss limitations of the estimates. Include a discussion of any modelling assumptions or data limitations that affect interpretation of the estimates. | Provided in narrative format; discussion section.                                                                         | Main text: discussion section                                                                                                                                                                |

## References

1. Jamison DT, Summers LH, Alleyne G, Arrow KJ, Berkley S, Binagwaho A, et al. Global health 2035: a world converging within a generation. *Lancet*. 2013;382(9908):1898–955.
2. Forouzanfar MH, Alexander L, Anderson HR, Bachman VF, Biryukov S, Brauer M, et al. Global, regional, and national comparative risk assessment of 79 behavioural, environmental and occupational, and metabolic risks or clusters of risks in 188 countries, 1990-2013: a systematic analysis for the Global Burden of Disease Study 2013. *Lancet*. 2015;386(10010):2287-323.
3. Oladimeji O, Access H, Quality Collaborators G. Healthcare access and quality index based on mortality from causes amenable to personal health care in 195 countries and territories, 1990-2015: a novel analysis from the Global Burden of Disease Study 2015. 2017.
4. World Health Organization. World Health Survey 2003 [Available from: <http://apps.who.int/healthinfo/systems/surveydata/index.php/catalog/whs/about>].
5. Demographic and Health Surveys Program. The DHS Program - Quality information to plan, monitor and improve population, health, and nutrition programs: USAID; [Available from: <http://dhsprogram.com/>].
6. UNICEF. Multiple Indicator Cluster Surveys (MICS) [Available from: <http://mics.unicef.org/>].
7. Thornicroft G, Chatterji S, Evans-Lacko S, Gruber M, Sampson N, Aguilar-Gaxiola S, et al. Undertreatment of people with major depressive disorder in 21 countries. *The British journal of psychiatry : the journal of mental science*. 2017;210(2):119–24.
8. UNAIDS. AIDSinfo 2016 [Available from: <http://aidsinfo.unaids.org/>].
9. WB. World Development Indicators. 2017.
10. Abajobir AA, Abate KH, Abbafati C, Abbas KM, Abd-Allah F, Abdulle A, et al. Measuring progress and projecting attainment on the basis of past trends of the health-related Sustainable Development Goals in 188 countries: an analysis from the Global Burden of Disease Study 2016. *The Lancet*. 2017;390(10100):1423-59.
11. WHO. Global Tuberculosis Report 2017. Geneva: World Health Organization; 2017.
12. World Health Organization. World malaria report 2017. Geneva: World Health Organization; 2017.
13. Watkins DA, Johnson CO, Colquhoun SM, Karthikeyan G, Beaton A, Bukhman G, et al. Global, Regional, and National Burden of Rheumatic Heart Disease, 1990–2015. *New England Journal of Medicine*. 2017;377(8):713-22.
14. Mogasale V, Maskery B, Ochiai RL, Lee JS, Mogasale VV, Ramani E, et al. Burden of typhoid fever in low-income and middle-income countries: a systematic, literature-based update with risk-factor adjustment. *The Lancet Global health*. 2014;2(10):e570-80.
15. World Health Organization. Chagas disease (American trypanosomiasis) World Health Organization,2018 [Available from: [http://www.who.int/en/news-room/fact-sheets/detail/chagas-disease-\(american-trypanosomiasis\)](http://www.who.int/en/news-room/fact-sheets/detail/chagas-disease-(american-trypanosomiasis))].
16. Status of endemicity of cutaneous leishmaniasis [Internet]. WHO. 2017 [cited June 18, 2018]. Available from: <http://apps.who.int/gho/data/node.main.NTDLEISHCEND?lang=en>.
17. Organization WH. Annex 1: Countries with risk of yellow fever transmission and countries requiring yellow fever vaccination. Geneva 2018.

18. Status of schistosomiasis endemic countries: 2016 [Internet]. World Health Organization. 2017 [cited June 17, 2018]. Available from: [http://apps.who.int/neglected\\_diseases/ntddata/sch/sch.html](http://apps.who.int/neglected_diseases/ntddata/sch/sch.html).
19. Bhatt S, Gething PW, Brady OJ, Messina JP, Farlow AW, Moyes CL, et al. The global distribution and burden of dengue. *Nature*. 2013;496(7446):504.
20. Number of new reported cases (T.b. rhodesiense) Data by country [Internet]. World Health Organization. 2017. Available from: <http://apps.who.int/gho/data/node.main.A1637?lang=en>.
21. Number of new reported cases (T.b. gambiense) Data by country [Internet]. World Health Organization. 2017. Available from: <http://apps.who.int/gho/data/node.main.A1636?lang=en>.
22. WHO, cartographer Distribution of Echinococcus granulosus and cystic echinococcosis, worldwide, 2011: WHO; 2012.
23. WHO, cartographer Endemicity of Taenia solium, 2015: WHO; 2016.
24. Wang H, Liang G. Epidemiology of Japanese encephalitis: past, present, and future prospects. *Therapeutics and clinical risk management*. 2015;11:435-48.
25. Number of children (Pre-SAC and SAC) requiring preventive chemotherapy for soil-transmitted helminthiases: 2016 [Internet]. WHO. 2017 [cited June 18, 2018]. Available from: [http://apps.who.int/neglected\\_diseases/ntddata/sth/sth.html](http://apps.who.int/neglected_diseases/ntddata/sth/sth.html).
